# Supplementary material for: Bifunctional magnetic nanoparticles with ion imprinting for improving the flow through determination of ultratraces of Cd(ii) using magnetic preconcentration
Source: Royal Society of Chemistry journal article supplement (doi:10.1039/d3ay02047a), 2024-01-01
Supplement: d3ay02047a1.pdf [file d3ay02047a1.pdf]

## Supplementary materials

# Bifunctional magnetic nanoparticles with ion imprinting for improving the flow through determination of ultratraces of Cd(II) using magnetic preconcentration

Yanina Susana Minaberry\*<sup>a, b</sup>, Leila Saleh Medina <sup>a, c</sup>, Daiana Cataneo<sup>a</sup>, Jorge Stripeikis<sup>b</sup>  
and Mabel Tudino<sup>a</sup>

<sup>a</sup> Facultad de Ciencias Exactas y Naturales, Universidad de Buenos Aires, Ciudad Universitaria Pab. II, C1428EHA, Ciudad de Buenos Aires, Argentina.

<sup>b</sup> Instituto Tecnológico de Buenos Aires, ITBA, Iguazú 341, Ciudad de Buenos Aires, Argentina.

<sup>c</sup> INQUIMAE, Instituto de Química Inorgánica Analítica y Química Física, Ciudad Universitaria Pab. II, C1428EHA, Buenos Aires, Argentina.

\*Corresponding author: e-mail: yanina. s.minaberry@gmail.com

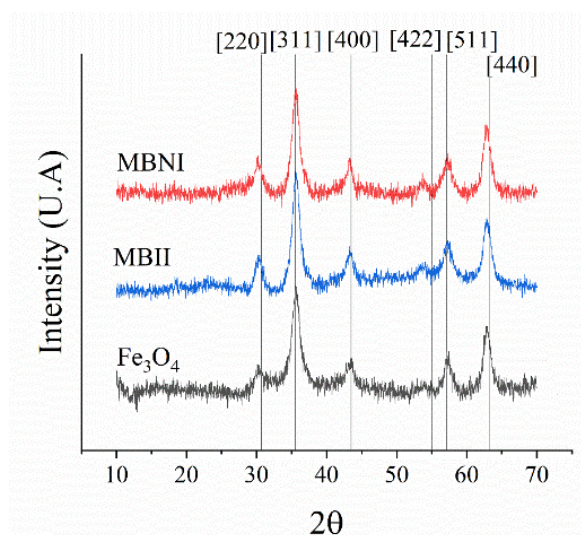

Fig.S1 DRX patterns for Fe<sub>3</sub>O<sub>4</sub>, MINI and MII solids.

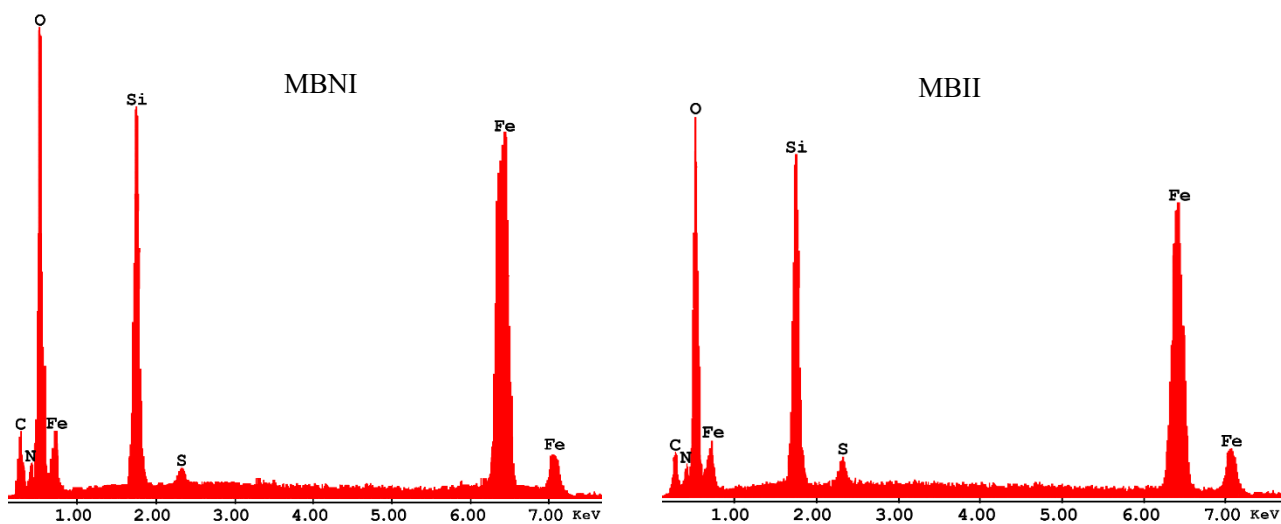

Fig. S2 EDS spectra of MBNI and MBII, after Cd(II) removal.

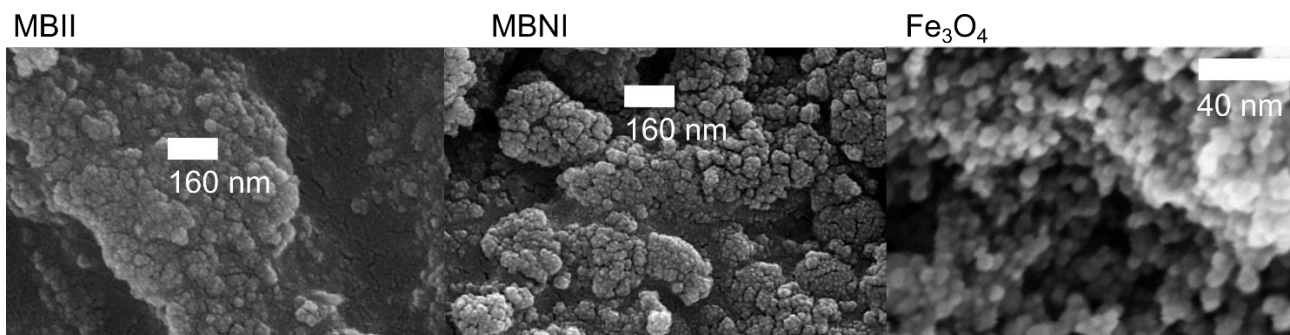

Fig.S3 SEM images: MBII, MBNI and Fe<sub>3</sub>O<sub>4</sub>.

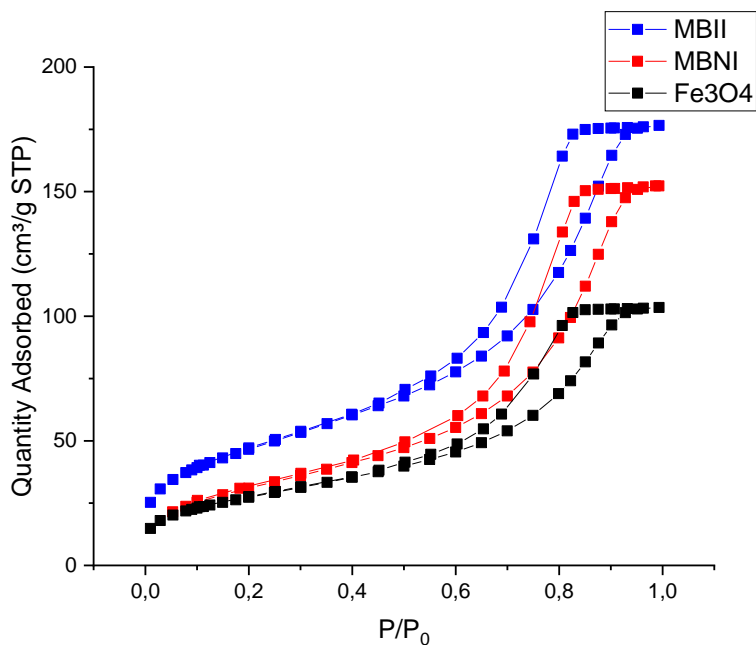

Fig. S4 N<sub>2</sub> adsorption–desorption isotherm of Fe<sub>3</sub>O<sub>4</sub>, MBII and MBNI.

Table S1. Information from N<sub>2</sub> adsorption–desorption isotherm.

| Sample                         | Área BET (m <sup>2</sup> /g) | Average pore width BET 4V/A (nm) |
|--------------------------------|------------------------------|----------------------------------|
| Fe <sub>3</sub> O <sub>4</sub> | 97                           | 0.8                              |
| MBNI                           | 115                          | 0.5                              |
| MBII                           | 167                          | 0.7                              |

Fig. S5 (A) and (B), clearly show how the proximity of one or two magnets with these configurations leads to an uneven adhesion of the particles.

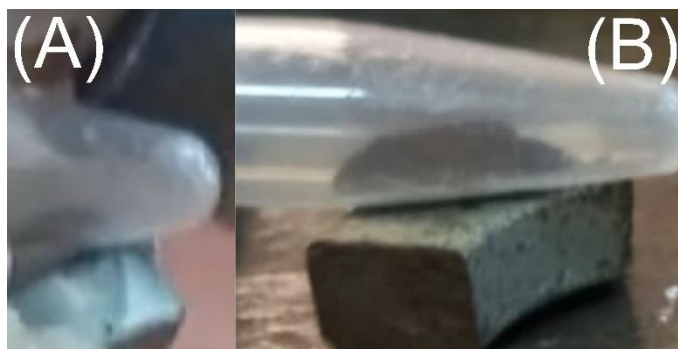

Fig. S5. (A) Magnetic solid with two magnets and (B) with only one.

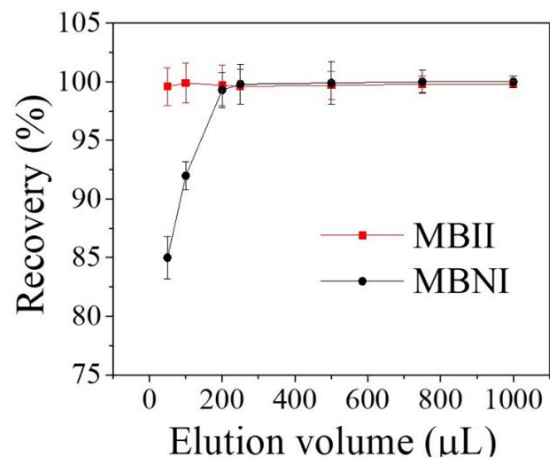

Fig. S6 Optimization of elution volume. [HCl]: 1 mol L<sup>-1</sup>, [Cd(II)]:0.02 ng mL<sup>-1</sup>, sample volume: 10 mL, adsorption flow rate: MBNI: 1.5 mL min<sup>-1</sup>,MBII: 2.5 mL min<sup>-1</sup>, and desorption flow rate: 1.0 mL min<sup>-1</sup> for both.

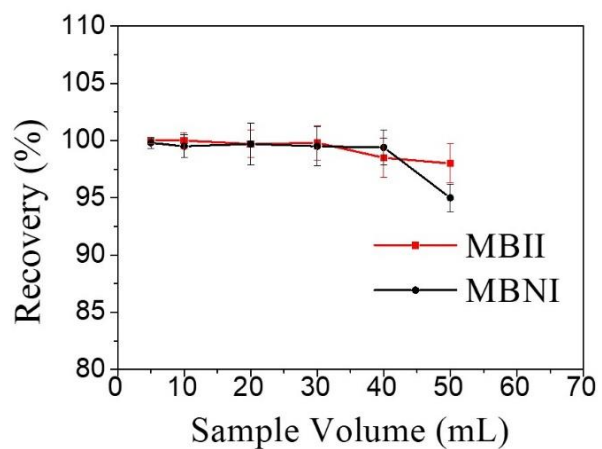

Fig. S7 Percentage recovery with sample volume under optimised conditions for MBII and MBNI.
